# Supplementary material
Source: PubMed Central journal article supplement (PMC10124074)
Supplement: mmc1.pdf [file mmc1.pdf]

**YMTHE, Volume 31**

## **Supplemental Information**

### **Genome editing with natural and engineered CjCas9 orthologs**

**Siqi Gao, Yao Wang, Tao Qi, Jingjing Wei, Ziyang Hu, Jingtong Liu, Shuna Sun, Huihui Liu, and Yongming Wang**

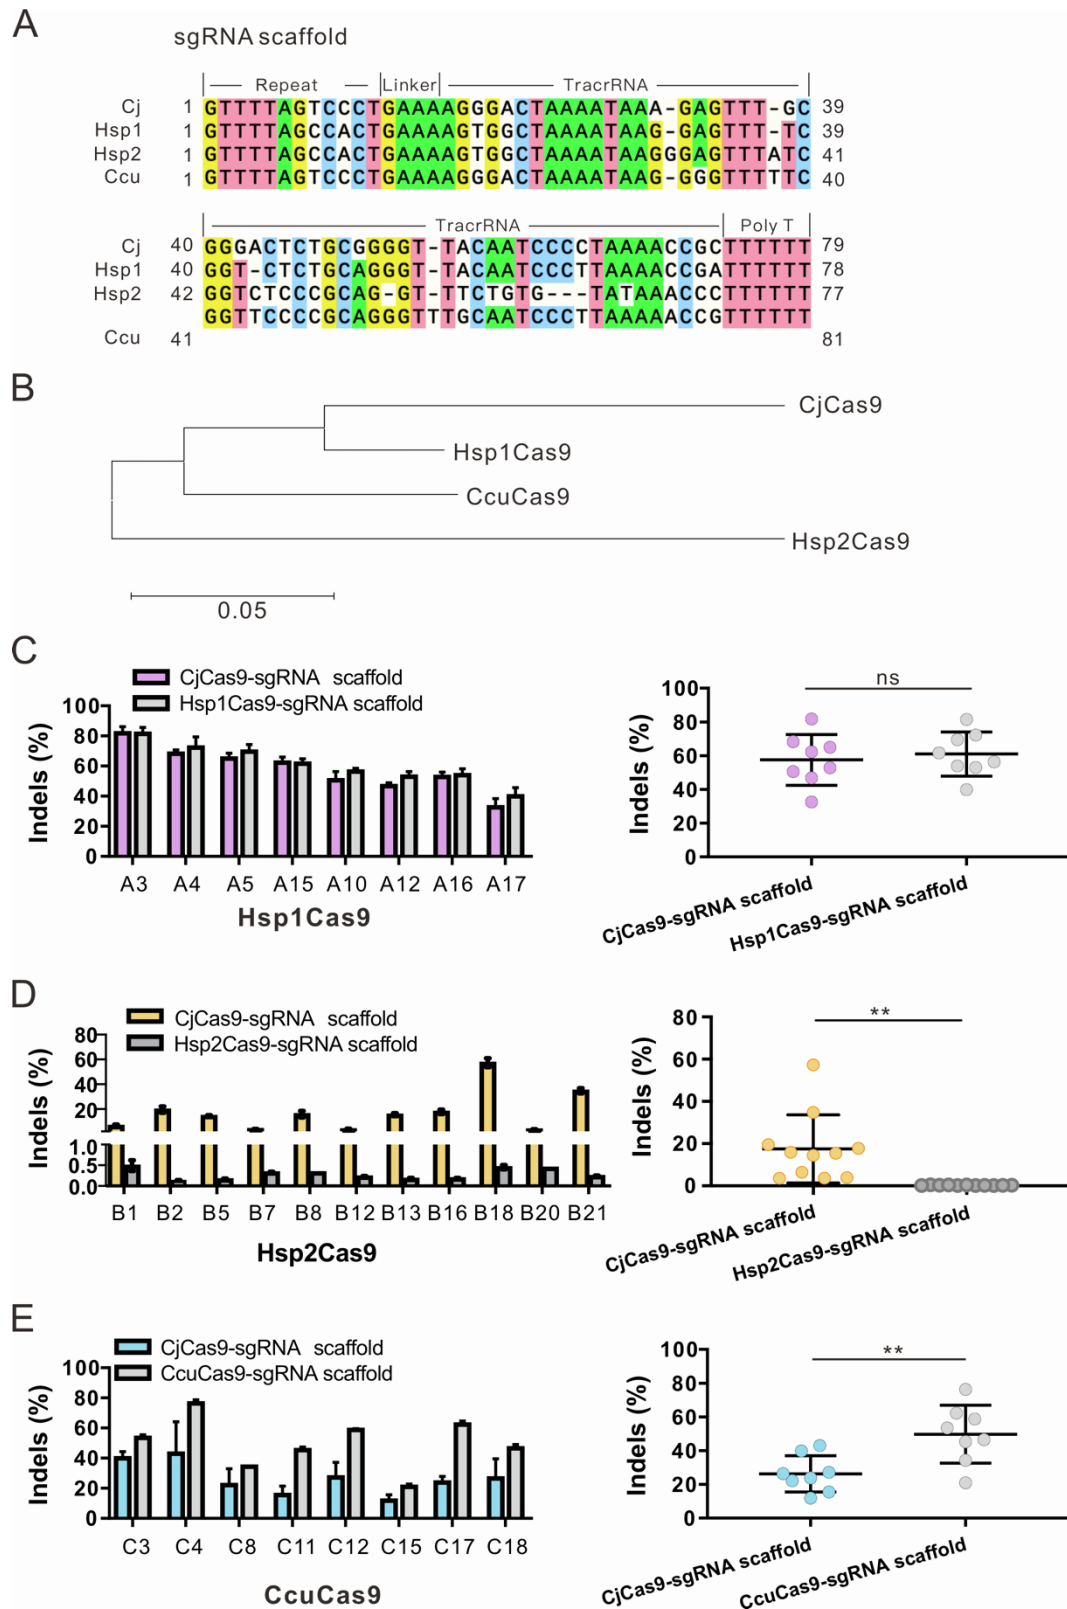

**Figure S1. CjCas9 orthologs enable genome editing guided by their sgRNA scaffolds**

(A) Comparison of the sgRNA scaffold sequences for CjCas9 orthologs. (B) The phylogenetic tree of the four sgRNA scaffolds. (C) The editing efficiencies of

Hsp1Cas9 with the CjCas9-sgRNA scaffold or Hsp1Cas9-sgRNA scaffold in HEK293T cells. (D) The editing efficiencies of Hsp2Cas9 with the CjCas9-sgRNA scaffold or Hsp2Cas9-sgRNA scaffold in HEK293T cells. (E) The editing efficiencies of CcuCas9 with the CjCas9-sgRNA scaffold or CcuCas9-sgRNA scaffold in HEK293T cells. Cells were treated with puromycin. The data represent the mean  $\pm$  SD; n=3. Student's t-test, \*\* $p < 0.01$ . Indel efficiencies were determined by targeted deep sequencing.

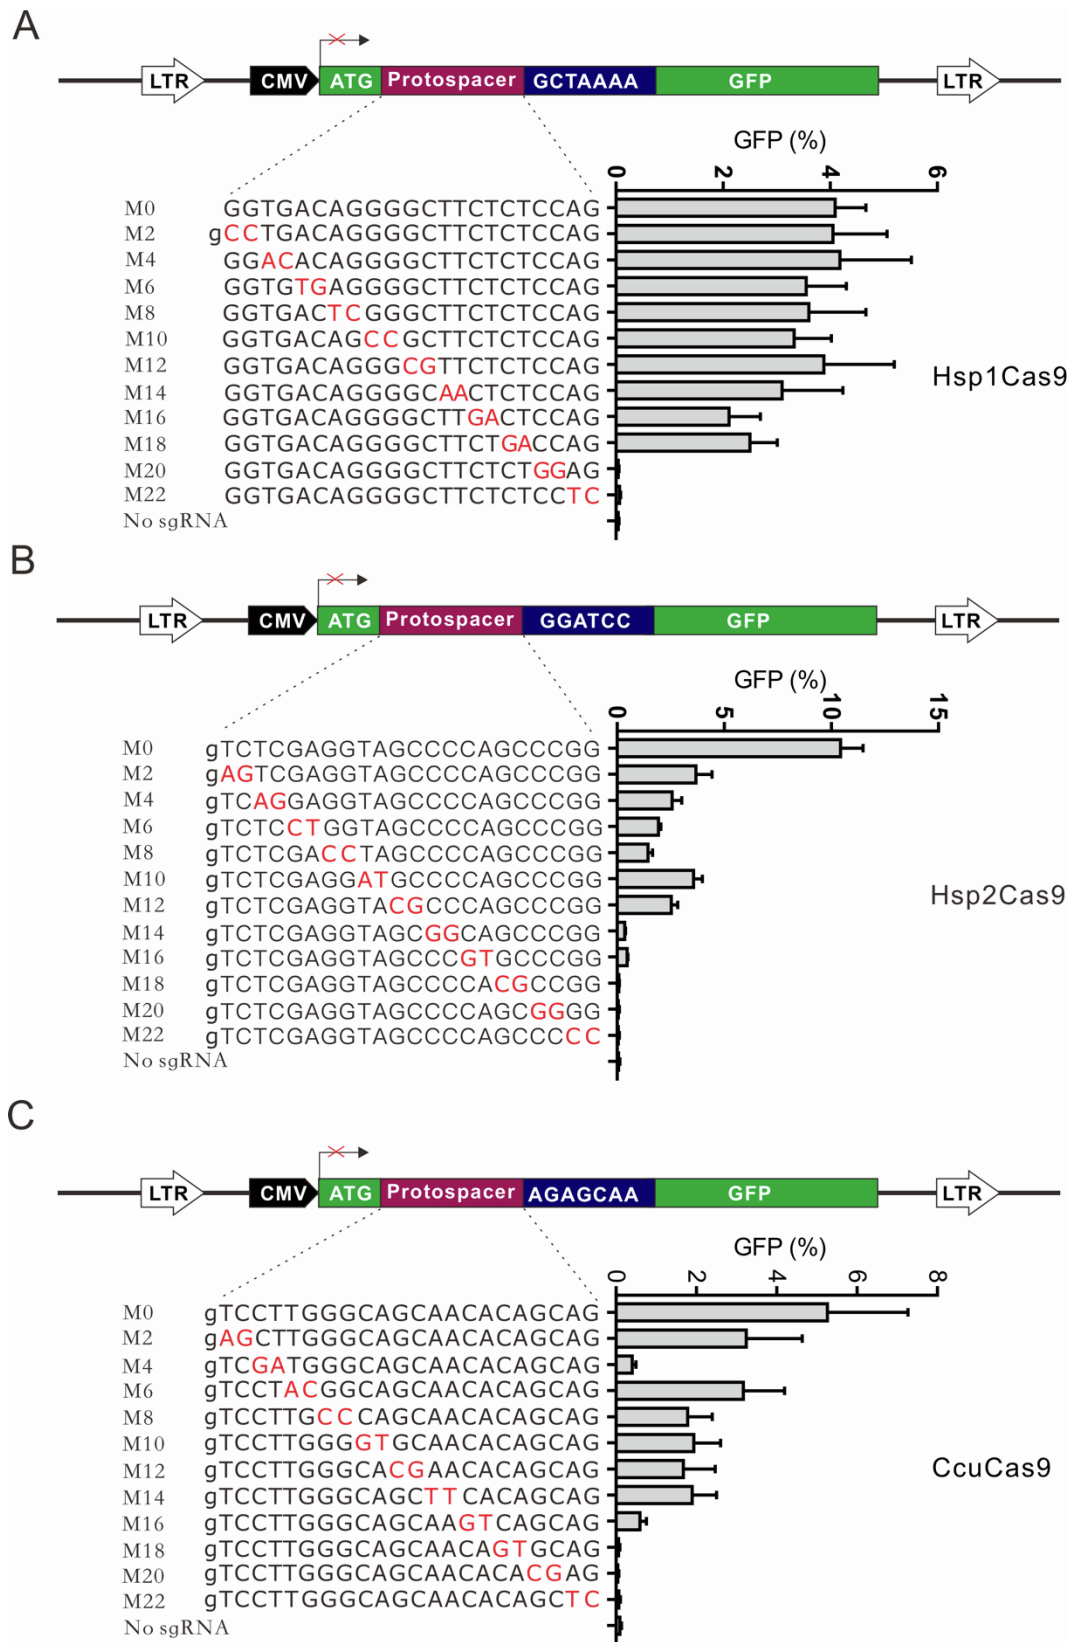

**Figure S2. Analysis of specificity for (A) Hsp1Cas9, (B) Hsp2Cas9, and (C) CcuCas9 by the GFP-activation assay.** Schematics of the GFP-activation reporters are shown on the top. A target sequence with the corresponding PAM is

inserted between ATG and GFP coding sequence, disrupting GFP expression. Cas9s were transfected with sgRNAs with CjCas9-sgRNA scaffold. Genome editing induced GFP expression. A panel of sgRNAs with dinucleotide mutations (red bases) is shown below. An additional G at the 5' terminal is added for U6 promoter transcription. The sgRNA activities were measured by the proportion of GFP-positive cells. The data represent the mean  $\pm$  SD; n=3.

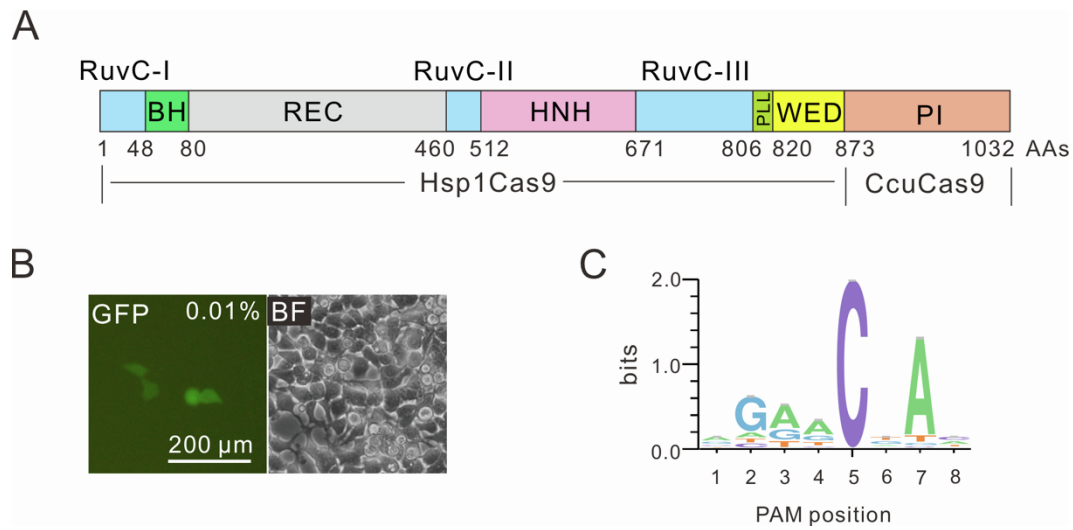

**Figure S3. Generation of chimeric Hsp1-CcuCas9**

(A) Schematic diagram of chimeric Hsp1-CcuCas9 nuclease. The Hsp1Cas9 PI domain was replaced with the CcuCas9 PI domain. (B) GFP-activation assay revealed that Hsp1-CcuCas9 induced GFP expression. The proportion of GFP-positive cells is shown. BF, bright field; GFP, green fluorescent protein. (C) WebLogo for Hsp1-CcuCas9 is generated based on deep sequencing data.

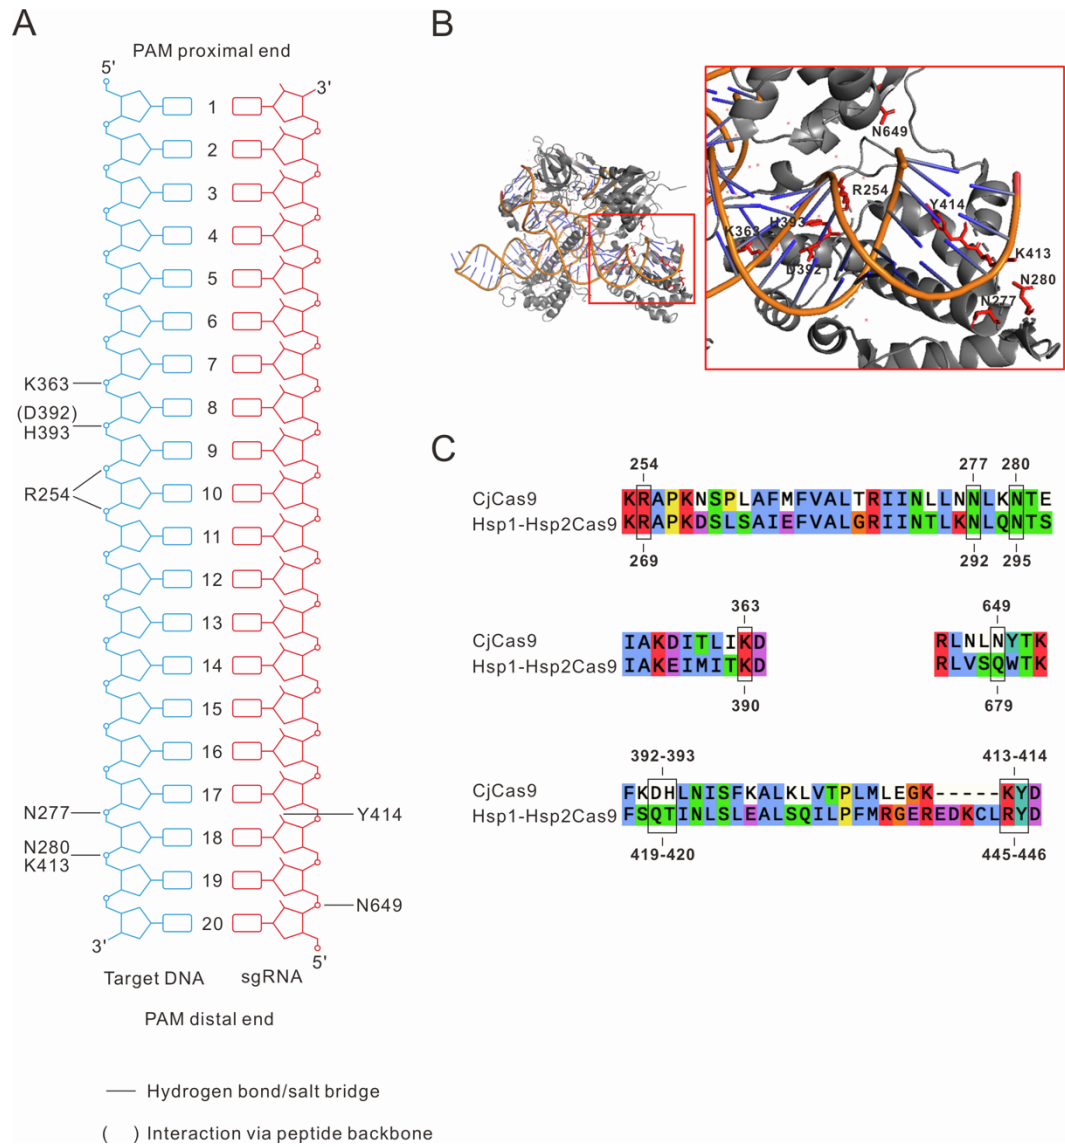

**Figure S4. Engineering of Hsp1-Hsp2Cas9 variants based on CjCas9 crystal structure**

(A) Schematic depicting interactions of CjCas9 residues with the target DNA-sgRNA duplex, based on PDB accession 5X2H and 5X2G<sup>1</sup>. (B) The crystal structure of the CjCas9 interacting with the target DNA-sgRNA duplex (SMTL ID: 5x2g.1.A). The nine residues that form hydrogen bonds at the target DNA-sgRNA interface are shown. (C) Alignment of CjCas9 and Hsp1-Hsp2Cas9 protein sequences. Black boxes indicate equivalent residues of CjCas9 and Hsp1-Hsp2Cas9 interacting with the target DNA-sgRNA duplex. The positions of the residues are shown.

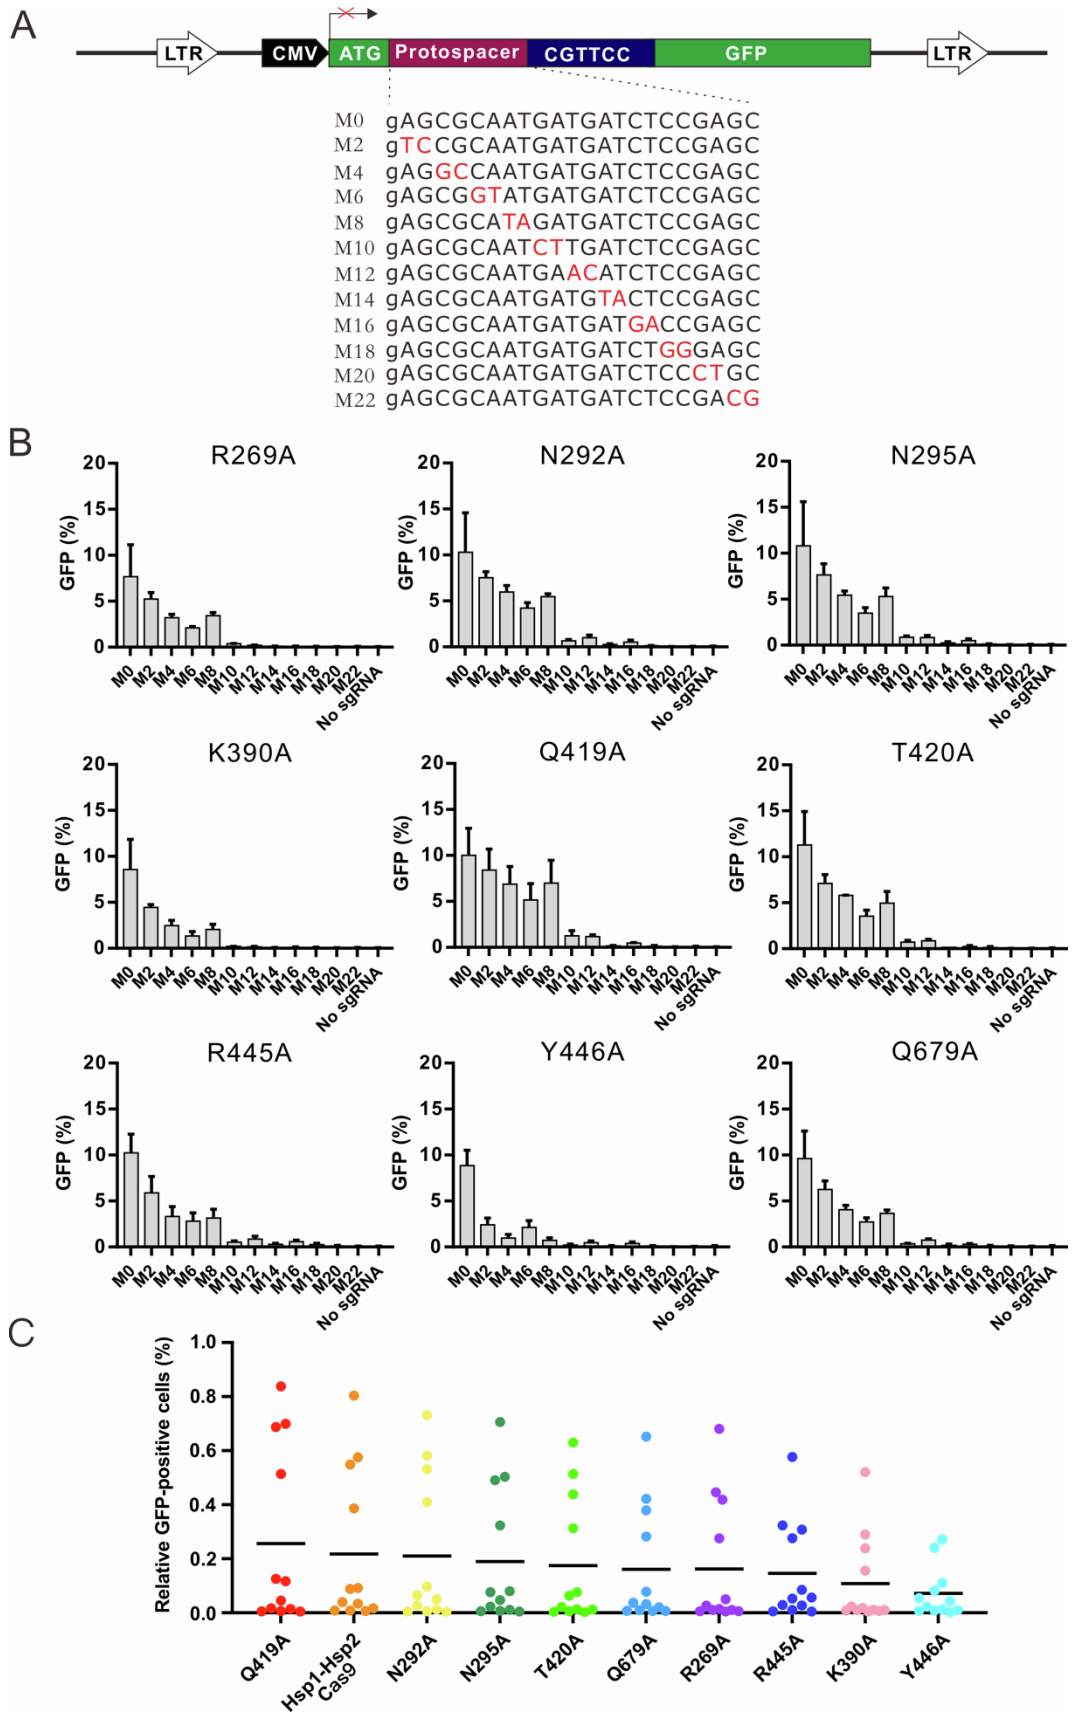

**Figure S5. Specificity analysis of Hsp1-Hsp2Cas9 variants**

(A) Schematic of the GFP-activation assay showing the specificity of the nucleases



in HEK293T cells on the top. Cas9s were transfected with sgRNAs with CjCas9-sgRNA scaffold. A panel of sgRNAs with dinucleotide mutations (red bases) is shown below. An additional G is added at the 5' end of sgRNA for U6 promoter transcription. (B) Specificity of single-mutation Hsp1-Hsp2Cas9 variants analyzed by the GFP-activation assay. The activity of each sgRNA of the Hsp1-Hsp2Cas9 variants was measured by the proportion of GFP-positive cells. The data represent the mean  $\pm$  SD; n=3. (C) Quantification of off-target editing efficiency based on GFP-activation assay. The off-target editing efficiency is normalized by on-target editing efficiency.

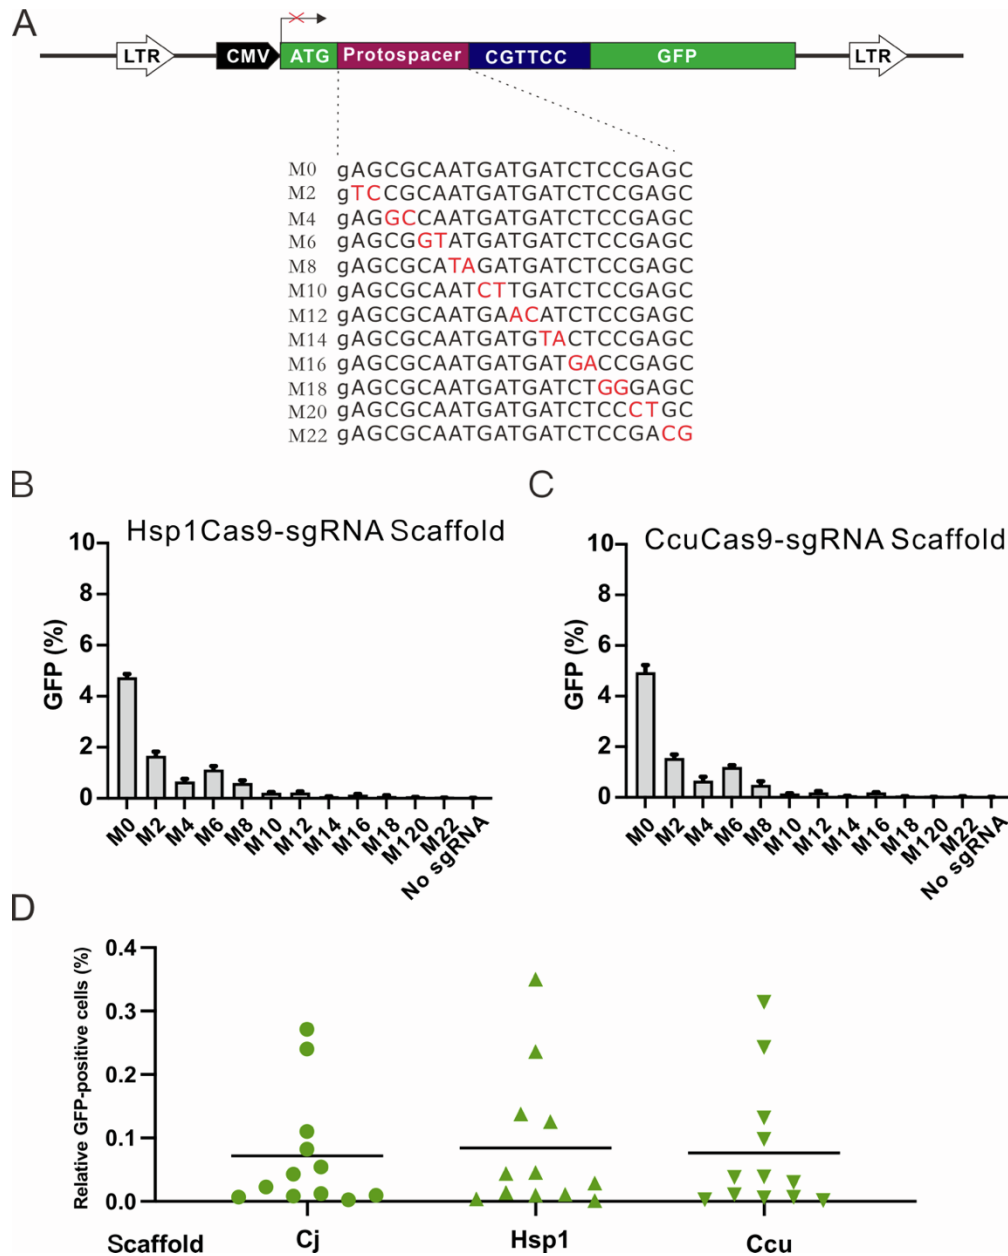

**Figure S6. Specificity analysis of Hsp1-Hsp2Cas9-Y with different scaffolds**

(A) Schematic of the GFP-activation assay showing the specificity of the nucleases in HEK293T cells on the top. A panel of sgRNAs with dinucleotide mutations (red bases) is shown below. An additional G is added at the 5' end of sgRNA for U6 promoter transcription. (B) Specificity of Hsp1-Hsp2Cas9-Y analyzed by the GFP-activation assay with sgRNAs with Hsp1Cas9-sgRNA scaffold. The data represent the mean  $\pm$  SD; n=3. (C) Specificity of Hsp1-Hsp2Cas9-Y analyzed by the GFP-activation assay with sgRNAs with CcuCas9-sgRNA scaffold. The data represent the mean  $\pm$  SD; n=3. (D) Quantification of off-target editing efficiency based on GFP-activation assay. The off-target editing efficiency is normalized by on-target editing efficiency.



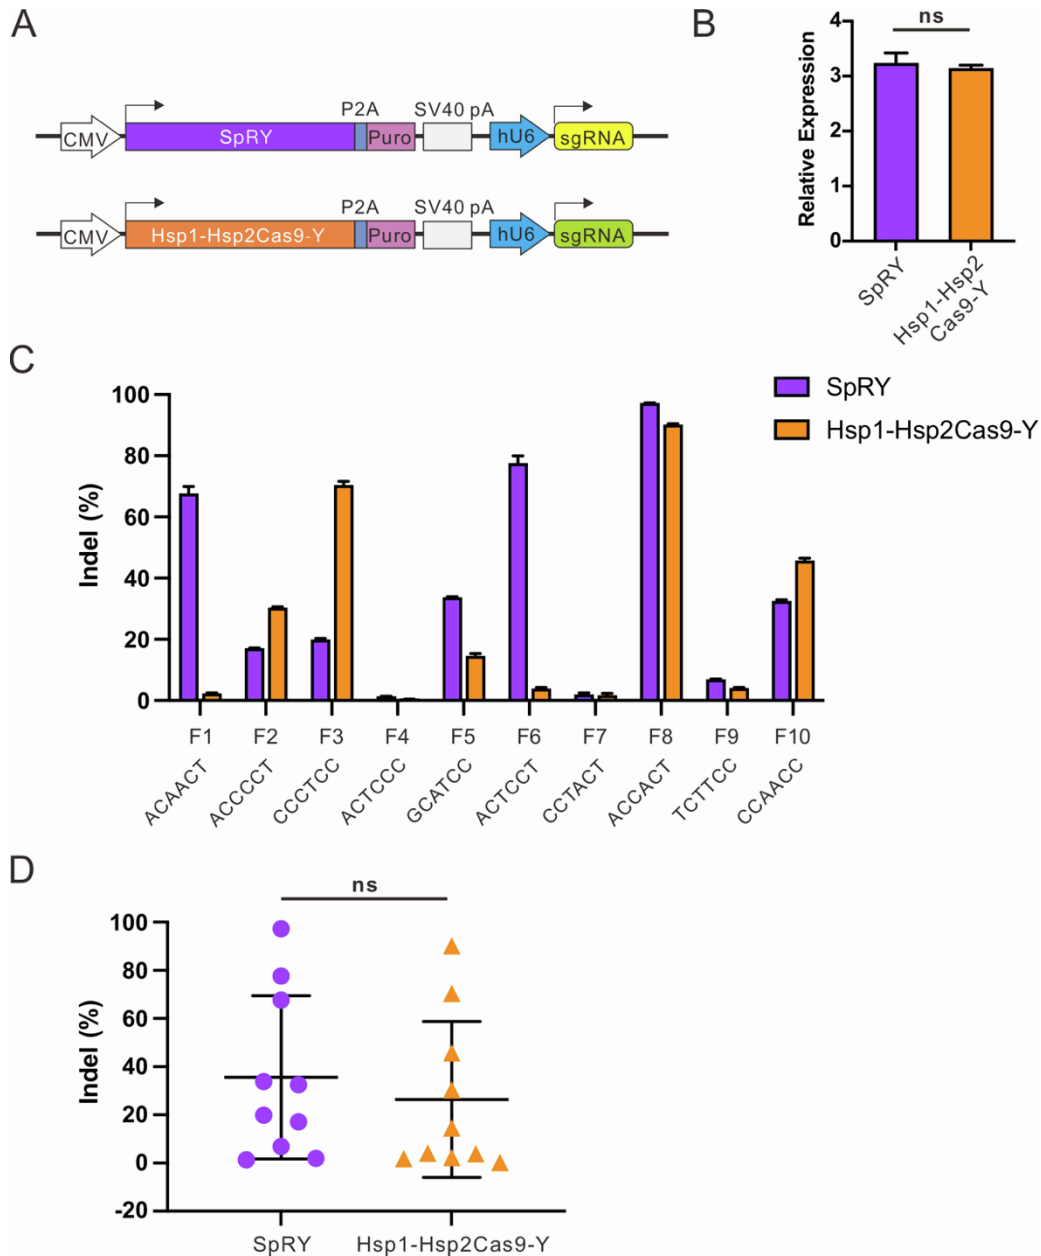

**Figure S8. Comparison of genome editing activity between SpRY and Hsp1-Hsp2Cas9-Y**

(A) Schematic of the Cas9 nuclease and sgRNA-expressing plasmid constructs. pA, polyA; Puro, puromycin resistant gene; hU6, human U6 promoter. SpRY was transfected with sgRNAs with the SpCas9-sgRNA scaffold. Hsp1-Hsp2Cas9-Y was transfected with sgRNAs with the CjCas9-sgRNA scaffold. (B) Expression levels of SpRY and Hsp1-Hsp2Cas9-Y relative to *GAPDH* were measured by RT-qPCR. (C) Comparison of SpRY and Hsp1-Hsp2Cas9-Y genome editing activity at ten endogenous sites with the N<sub>4</sub>CY PAM in HEK293T cells. Cells were treated with puromycin. Indel efficiencies were determined by targeted deep sequencing. The data represent the mean  $\pm$  SD; n=3. (D) Quantification of the editing efficiencies of SpRY and Hsp1-Hsp2Cas9-Y. The data represent the mean  $\pm$  SD.

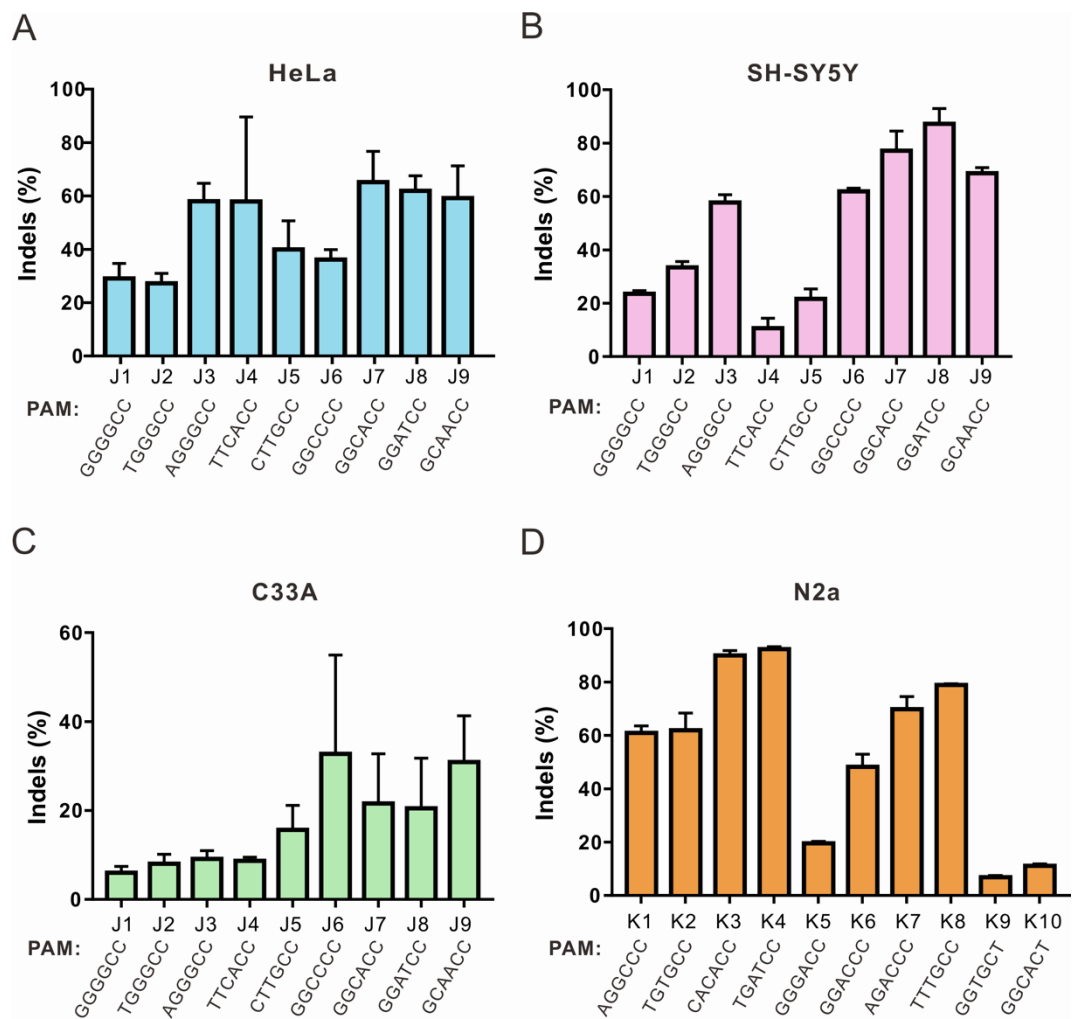

**Figure S9. Hsp1-Hsp2Cas9-Y enables genome editing in diverse cell types**  
Hsp1-Hsp2Cas9-Y enables genome editing in diverse cell types, including (A) HeLa, (B) SH-SY5Y, (C) C33A, and (D) N2a cells. The PAM sequences are shown below. Hsp1-Hsp2Cas9-Y was transfected with sgRNAs with the CjCas9-sgRNA scaffold. Cells were treated with puromycin. Indel efficiencies were determined by targeted deep sequencing. The data represent the mean  $\pm$  SD; n=3.

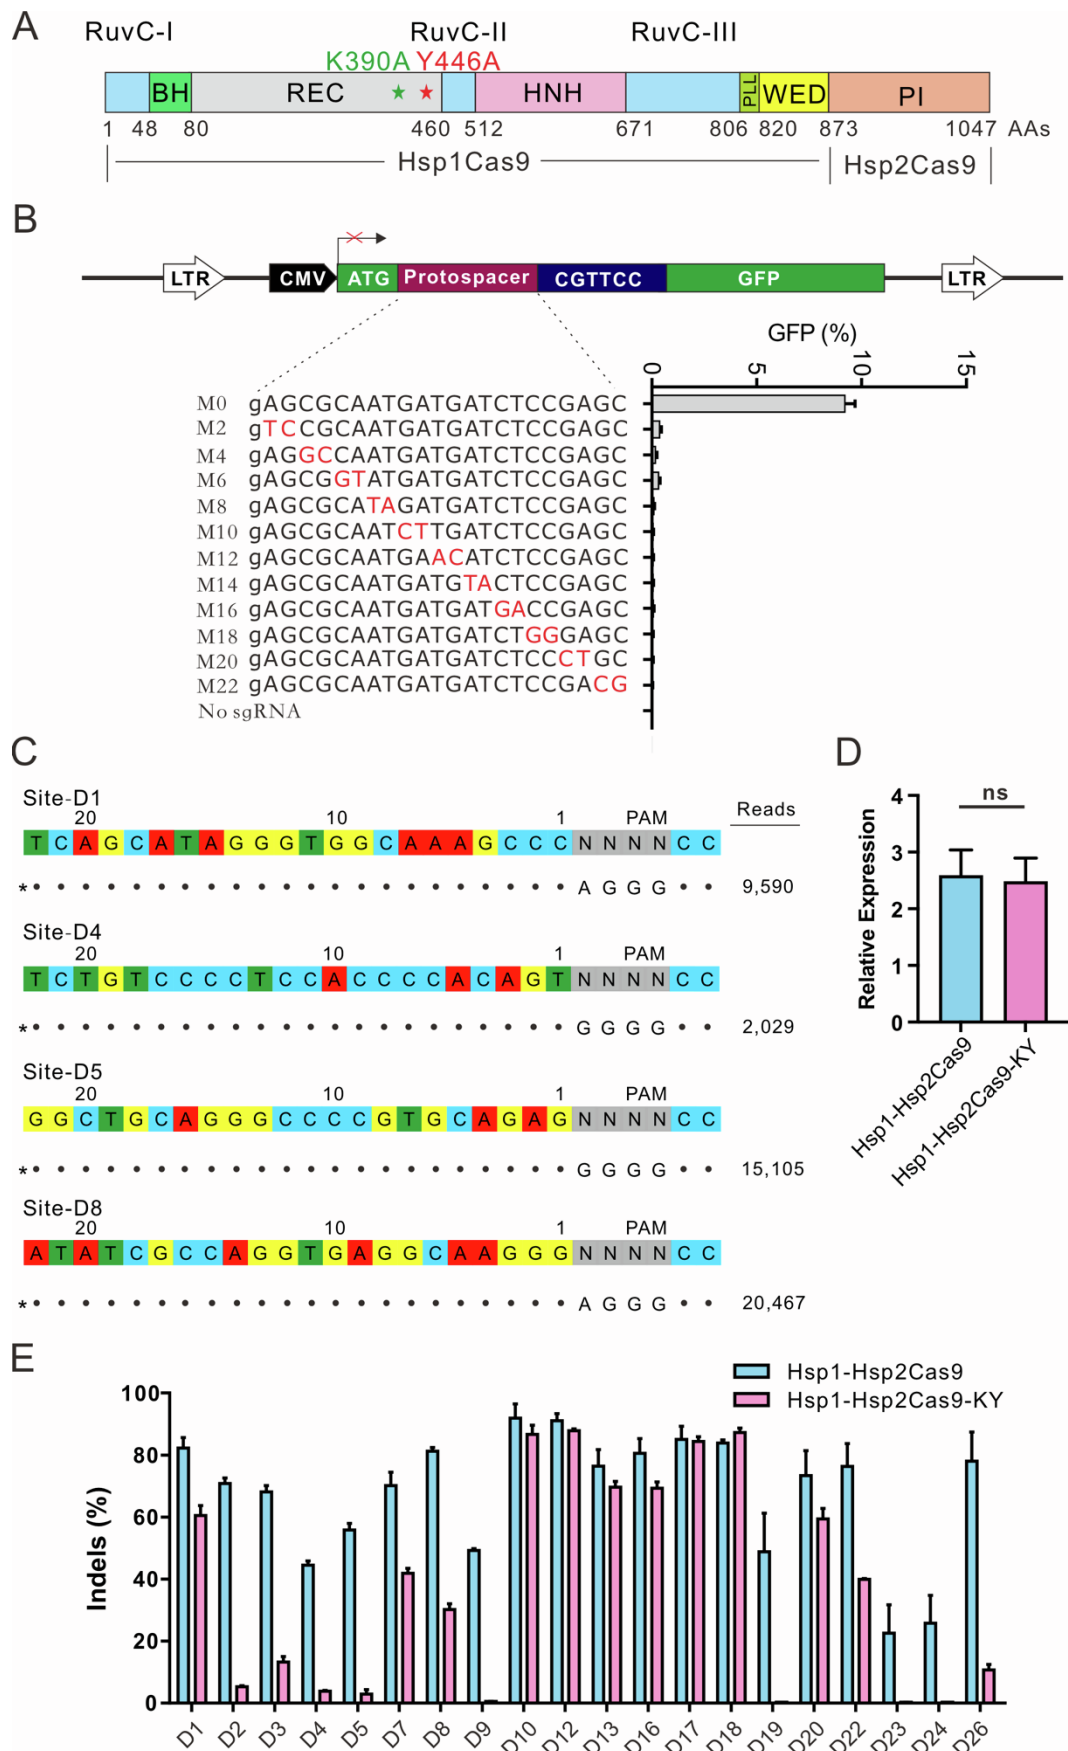

**Figure S10. Characterization of Hsp1-Hsp2Cas9-KY for Genome editing**

(A) Schematic diagram of chimeric Hsp1-Hsp2Cas9-KY nuclease. It contains K390A and Y446A mutations. (B) The specificity of Hsp1-Hsp2Cas9-KY is evaluated by the GFP-activation assay. Hsp1-Hsp2Cas9-KY was transfected with sgRNAs with the CjCas9-sgRNA scaffold. A panel of sgRNAs with dinucleotide mutations (red bases) is shown below. An additional G at the 5' terminal is added for U6 promoter transcription. The data represent the mean  $\pm$  SD; n=3. (C) Genome-wide specificities of Hsp1-Hsp2Cas9-KY determined by GUIDE-seq. Hsp1-Hsp2Cas9-KY was transfected with sgRNAs with the CjCas9-sgRNA scaffold. The on-target site is marked with "\*". Read counts are listed on the right. (D) Expression levels of Hsp1-Hsp2Cas9 and Hsp1-Hsp2Cas9-KY relative to *GAPDH* were measured by RT-qPCR. (E) Comparison of Hsp1-Hsp2Cas9 and Hsp1-Hsp2Cas9-KY genome editing activity at 20 endogenous sites with the N<sub>4</sub>CC PAM in HEK293T cells. Hsp1-Hsp2Cas9 and Hsp1-Hsp2Cas9-KY were transfected with sgRNAs with the CjCas9-sgRNA scaffold. Cells were treated with puromycin. The data represent the mean  $\pm$  SD; n=3.

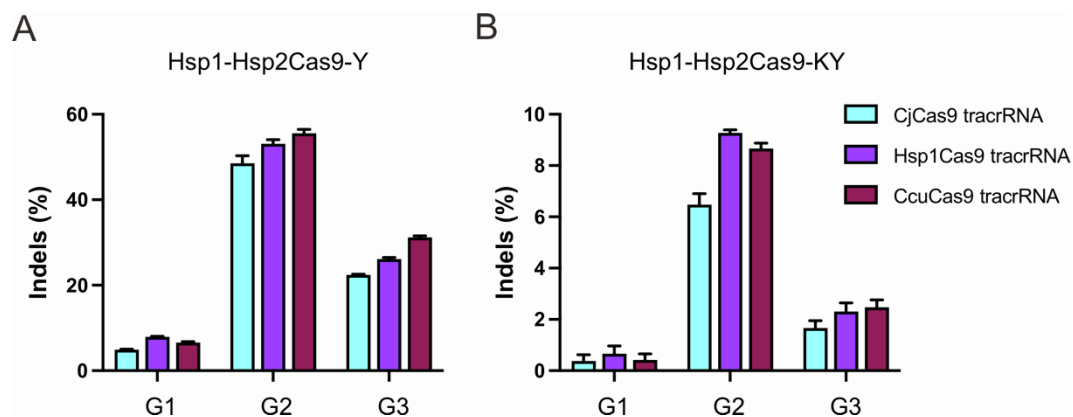

**Figure S11. Test of genome editing activity of Hsp1-Hsp2Cas9-Y and Hsp1-Hsp2Cas9-KY with different sgRNA scaffolds**

(A) Genome editing ability of Hsp1-Hsp2Cas9-Y with different scaffolds measured by targeted deep sequencing. Cells were treated with puromycin. The data represent the mean  $\pm$  SD; n=3. (B) Genome editing ability of Hsp1-Hsp2Cas9-KY with different scaffolds measured by targeted deep sequencing. The data represent the mean  $\pm$  SD; n=3.



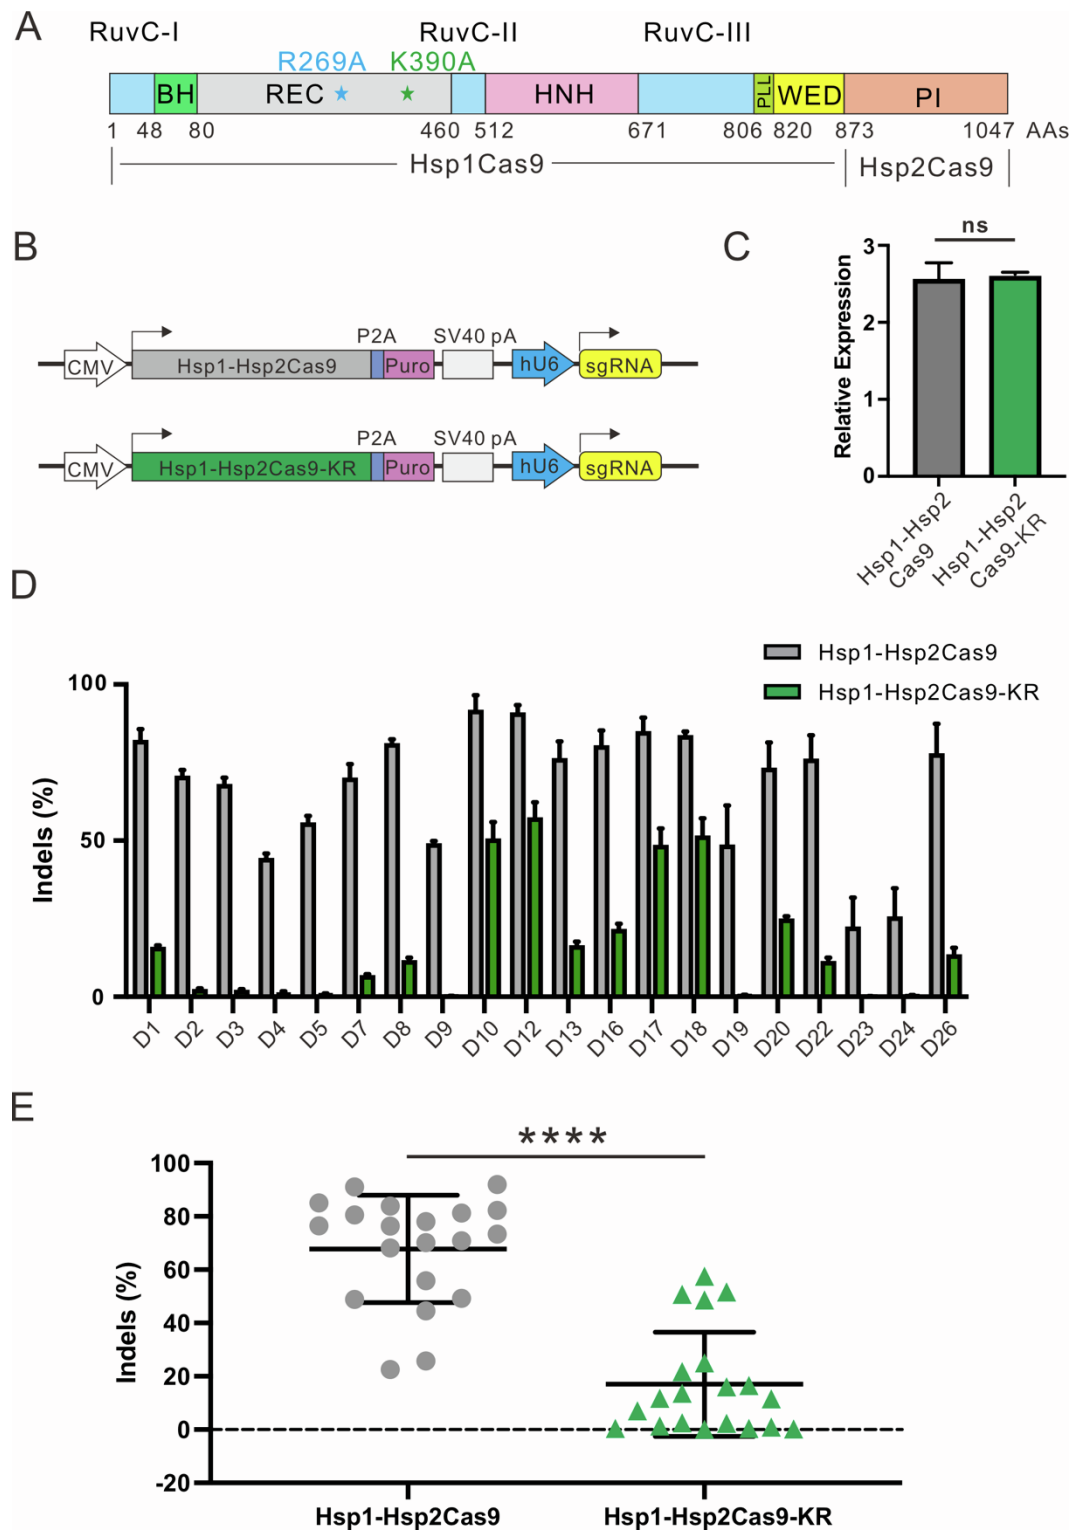

**Figure S12. Comparison of genome editing activity between Hsp1-Hsp2Cas9 and Hsp1-Hsp2Cas9-KR**

(A) Schematic diagram of chimeric Hsp1-Hsp2Cas9-KR nuclease. It contains K390A and R269A mutations. (B) Schematic of plasmid constructs of the Cas9 nuclease and sgRNA with CjCas9-sgRNA scaffold. pA, polyA; Puro, puromycin resistant gene; hU6, human U6 promoter. Both Cas9 were transfected with sgRNAs

with the CjCas9-sgRNA scaffold. (C) Expression levels of Hsp1-Hsp2Cas9-Y and Hsp1-Hsp2Cas9-KY relative to *GAPDH* were measured by RT-qPCR. (D) Comparison of Hsp1-Hsp2Cas9 and Hsp1-Hsp2Cas9-KR genome editing activity at 20 endogenous sites with the N<sub>4</sub>CC PAM in HEK293T cells. Cells were treated with puromycin. The data represent the mean  $\pm$  SD; n=3. (E) Quantification of the editing efficiencies of Hsp1-Hsp2Cas9 and Hsp1-Hsp2Cas9-KY. Indel efficiencies were determined by targeted deep sequencing. The data represent the mean  $\pm$  SD.

## REFERENCES

1. Yamada, M., Watanabe, Y., Gootenberg, J.S., Hirano, H., Ran, F.A., Nakane, T., Ishitani, R., Zhang, F., Nishimasu, H., and Nureki, O. (2017). Crystal Structure of the Minimal Cas9 from *Campylobacter jejuni* Reveals the Molecular Diversity in the CRISPR-Cas9 Systems. *Mol Cell* *65*, 1109-1121 e1103. [10.1016/j.molcel.2017.02.007](https://doi.org/10.1016/j.molcel.2017.02.007).

**Table S1. Summary of the type II-A and type II-C Cas9 orthologs**

| Type      | Cas9      | PAM      | Size (aa) | Activity | Specificity | Reference                |
|-----------|-----------|----------|-----------|----------|-------------|--------------------------|
| Type II-A | SpCas9    | NGG      | 1368      | High     | Low         | Jinek et al. (2012)      |
| Type II-A | SaCas9    | NNGRRT   | 1053      | High     | Medium      | Ran et al. (2015)        |
| Type II-A | ScCas9    | NNG      | 1380      | Medium   | Low         | Chatterjee et al. (2018) |
| Type II-A | SlugCas9  | NNGG     | 1054      | High     | Medium      | Hu et al. (2021)         |
| Type II-A | SauriCas9 | NNGG     | 1061      | High     | Medium      | Hu et al. (2020)         |
| Type II-A | SchCas9   | NNGR     | 1054      | Medium   | High        | Wang et al. (2022)       |
| Type II-A | St1Cas9   | NNRGAA   | 1121      | Medium   | Medium      | Agudelo et al. (2020)    |
| Type II-C | NmeCas9   | NNNNGATT | 1082      | Medium   | High        | Amrani et al. (2018)     |
| Type II-C | Nme2Cas9  | NNNNCC   | 1082      | Medium   | High        | Edraki et al. (2019)     |
| Type II-C | CjCas9    | NNNNRYAC | 984       | Medium   | High        | Kim et al. (2017)        |
| Type II-C | Nsp2Cas9  | NNNNCC   | 1067      | Medium   | High        | Wei et al. (2022)        |
| Type II-C | BlatCas9  | NNNNCNAA | 1092      | Medium   | High        | Gao et al. (2020)        |

**The following tables are submitted in Excel format**

Table S2. DNA sequences of plasmids were used in this study

Table S3. The human codon-optimized Cas9 sequences

Table S5. Primers used in this study

Table S6. All data in this study

Table S7. The information of raw sequencing data

**Table S4. Target sites used in this study**

|                 | <b>Name</b> | <b>Gene</b>              | <b>Target Seq</b>        | <b>PAM</b>                      | <b>Description</b>              |
|-----------------|-------------|--------------------------|--------------------------|---------------------------------|---------------------------------|
| <b>Figure3B</b> | A1          | VEGFA                    | ggtgacaaggggctctctccag   | GCTAAAA                         | Endogenous target site of human |
|                 | A2          | GRIN2B                   | gtgacaaggggaataaagcca    | CCTGAAA                         | Endogenous target site of human |
|                 | A3          | VEGFA                    | ccgattcaagtgggaaatggca   | AGCAAAA                         | Endogenous target site of human |
|                 | A4          | VEGFA                    | gggcaaggggttgtaactgag    | GGTAAAA                         | Endogenous target site of human |
|                 | A5          | VEGFA                    | tcagttcgaggaaggggaaggg   | GGCAAAA                         | Endogenous target site of human |
|                 | A6          | EMX1                     | gaggaacctaatacaattgtg    | ACTAAAA                         | Endogenous target site of human |
|                 | A7          | GRIN2B                   | cagtattcagtgtcgaagaagg   | TCAAGAA                         | Endogenous target site of human |
|                 | A8          | EMX1                     | aaagactgagagaacatgagg    | ACAGAAA                         | Endogenous target site of human |
|                 | A9          | EMX1                     | caagagaataggctctaagaag   | AGTAAAA                         | Endogenous target site of human |
|                 | A10         | GRIN2B                   | cagtcagctctgtgtgtgagg    | GGGAAAA                         | Endogenous target site of human |
|                 | A11         | GRIN2B                   | tttggaagaaaaggccaaga     | TATGAAA                         | Endogenous target site of human |
|                 | A12         | GRIN2B                   | aggatgggtaagatggcactg    | AGGAAAA                         | Endogenous target site of human |
|                 | A13         | VEGFA                    | actgagggtaaaagactggg     | GTAGGAA                         | Endogenous target site of human |
|                 | A14         | VEGFA                    | ggctgggagcctcgaatgcaag   | GAGGAAA                         | Endogenous target site of human |
|                 | A15         | VEGFA                    | tggggctgtctgggaactggg    | CTGGGAA                         | Endogenous target site of human |
|                 | A16         | GRIN2B                   | gaggtgacaaggggggaagga    | GTGGGAA                         | Endogenous target site of human |
|                 | A17         | GRIN2B                   | ggtgacagcagcaatgagaatg   | TATAGAA                         | Endogenous target site of human |
| <b>Figure3C</b> | B1          | AAVS1                    | cgcaacctccaagaagggaag    | TTTTCC                          | Endogenous target site of human |
|                 | B2          | AAVS1                    | agggaggaagatgcccggaga    | GGACCC                          | Endogenous target site of human |
|                 | B3          | GRIN2B                   | gagtgtgtagcctgtgagcgg    | TGGTCC                          | Endogenous target site of human |
|                 | B4          | GRIN2B                   | aaagggagtgatggaatgaga    | GGATCC                          | Endogenous target site of human |
|                 | B5          | AAVS1                    | aggaactgactgggtcagcag    | GCTGCC                          | Endogenous target site of human |
|                 | B6          | GRIN2B                   | aaagggagtgatggaatgaga    | GATCCC                          | Endogenous target site of human |
|                 | B7          | AAVS1                    | aaagcctgagcgcctctctggg   | CTTGCC                          | Endogenous target site of human |
|                 | B8          | AAVS1                    | tggtgcaagcggcgaagaaggag  | TGCTCC                          | Endogenous target site of human |
|                 | B9          | GRIN2B                   | aatatcaagccaactcaaatag   | ACTACC                          | Endogenous target site of human |
|                 | B10         | GRIN2B                   | gtagcttctctctctccaagg    | TCTGCC                          | Endogenous target site of human |
|                 | B11         | VEGFA                    | atcttaagtgtatgctctgtgg   | ACTTCC                          | Endogenous target site of human |
|                 | B12         | VEGFA                    | ccgggagcctccaactcctctg   | GGCCCC                          | Endogenous target site of human |
|                 | B13         | VEGFA                    | aggggggtgcccaggaaggaag   | GGCACC                          | Endogenous target site of human |
|                 | B14         | VEGFA                    | atgtctatcagcgcagctactg   | CCATCC                          | Endogenous target site of human |
|                 | B15         | VEGFA                    | gagagaaggggctctcagcag    | GCATCC                          | Endogenous target site of human |
|                 | B16         | VEGFA                    | tctcgaaggaagcccaagccgg   | GGATCC                          | Endogenous target site of human |
|                 | B17         | VEGFA                    | tggaaaggaagcaatgctctctg  | GTCTCC                          | Endogenous target site of human |
|                 | B18         | VEGFA                    | tggaggtagagcagcaaggaag   | GGCTCC                          | Endogenous target site of human |
|                 | B19         | VEGFA                    | ccgaagcctcgggaagcagcgg   | CCGGCC                          | Endogenous target site of human |
|                 | B20         | GRIN2B                   | tttaacatgagagaacaatactg  | GCATCC                          | Endogenous target site of human |
|                 | B21         | EMX1                     | ctccaagcctgggcgatacaggg  | AGATCC                          | Endogenous target site of human |
|                 | B22         | VEGFA                    | tagcagcagccctgtccactgg   | CTTTCC                          | Endogenous target site of human |
| <b>Figure3D</b> | C1          | AAVS1                    | cgcaacctccaagaagggaag    | TTTTCAA                         | Endogenous target site of human |
|                 | C2          | VEGFA                    | gacggaagcaagcaagcaagcc   | GCCCCA                          | Endogenous target site of human |
|                 | C3          | AAVS1                    | tcttgggagcaagcaagcag     | AGAGCAA                         | Endogenous target site of human |
|                 | C4          | AAVS1                    | agggaggaagatgcccggaga    | GGACCCA                         | Endogenous target site of human |
|                 | C5          | VEGFA                    | ccggcggcgaagcaagtgagcgg  | GCGGCCA                         | Endogenous target site of human |
|                 | C6          | VEGFA                    | tgggacactgaggaagcaag     | AGAGCAA                         | Endogenous target site of human |
|                 | C7          | VEGFA                    | gggagcaagcaagcagactcca   | ACAACCA                         | Endogenous target site of human |
|                 | C8          | AAVS1                    | tgaagaatggtgctgctactggtg | TTCACCA                         | Endogenous target site of human |
|                 | C9          | VEGFA                    | ctgttccaagaatgttaacccc   | CTCCCTA                         | Endogenous target site of human |
|                 | C10         | VEGFA                    | agggcggcgtgtgcaagcaag    | TGCTCCA                         | Endogenous target site of human |
|                 | C11         | VEGFA                    | tctccaagcctcaactctgccc   | AGTGCTA                         | Endogenous target site of human |
|                 | C12         | VEGFA                    | tctcgaaggaagcccaagccgg   | GGATCCA                         | Endogenous target site of human |
|                 | C13         | VEGFA                    | gcaagcaaggaagcctccaatg   | CACCCAA                         | Endogenous target site of human |
|                 | C14         | VEGFA                    | aggggacggaagattcaatccc   | CTTCCAA                         | Endogenous target site of human |
|                 | C15         | VEGFA                    | caaacctggaagcaagtgcca    | CCACCAA                         | Endogenous target site of human |
|                 | C16         | VEGFA                    | cgggagcctccaactcctctg    | GCCCCAA                         | Endogenous target site of human |
|                 | C17         | VEGFA                    | gtgagaagtgagaagagaagca   | CGGGCCA                         | Endogenous target site of human |
|                 | C18         | TIMM8B                   | atgtatgtccaaggtcatgtag   | CCAGCAA                         | Endogenous target site of human |
|                 | C19         | VEGFA                    | agaataagcccaagcctctctg   | ACTGCTA                         | Endogenous target site of human |
|                 | C20         | VEGFA                    | ctggaaagagcaagaaagaaag   | GCAACAA                         | Endogenous target site of human |
|                 | C21         | TIMM8B                   | gtgggaggaagaggggtgctcgg  | ATGACCA                         | Endogenous target site of human |
|                 | C22         | VEGFA                    | caagatgagggaagcctggaag   | GGGCCAA                         | Endogenous target site of human |
| C23             | LINCO1588   | ttggaagtgtttgtagagga     | GGGACAA                  | Endogenous target site of human |                                 |
| C24             | VEGFA       | ccaaggaagatgagaagccaagga | AGGACCA                  | Endogenous target site of human |                                 |
| C25             | VEGFA       | ggagggggagaagggacagag    | AGGGCAA                  | Endogenous target site of human |                                 |
| <b>Figure4D</b> | D1          | AAVS1                    | tcaagcaatgggtgcaaaagccc  | AGGGCC                          | Endogenous target site of human |
|                 | D2          | AAVS1                    | gcaagcgaagatgacaatggcc   | AGGGCC                          | Endogenous target site of human |
|                 | D3          | AAVS1                    | ctctgacctgcaattctctccc   | TGGGCC                          | Endogenous target site of human |
|                 | D4          | AAVS1                    | tctgtcccctcaagcccaagct   | GGGGCC                          | Endogenous target site of human |
|                 | D5          | AAVS1                    | ggctgcaagggcccgtgcaag    | GGGGCC                          | Endogenous target site of human |
|                 | D6          | AAVS1                    | cgccggggctcagcctcggcc    | GGGGCC                          | Endogenous target site of human |
|                 | D7          | AAVS1                    | cttctccaagcctgcaatgccc   | TGGGCC                          | Endogenous target site of human |
|                 | D8          | AAVS1                    | atatcgccaagtgaggcaaggg   | AGGGCC                          | Endogenous target site of human |
|                 | D9          | AAVS1                    | gaatcatgtcccaagcagtgga   | TGGGCC                          | Endogenous target site of human |
|                 | D10         | AAVS1                    | agggaggaagatgcccggaga    | GGACCC                          | Endogenous target site of human |
|                 | D11         | AAVS1                    | gggtctgagggaggaagggcctg  | GGGGCC                          | Endogenous target site of human |
|                 | D12         | AAVS1                    | tgagaatggtgctgctactggtg  | TTCACC                          | Endogenous target site of human |
|                 | D13         | AAVS1                    | aaagcctgagcgcctcctctggg  | CTTGCC                          | Endogenous target site of human |
|                 | D14         | AAVS1                    | gttccctttctctctctctct    | GGGGCC                          | Endogenous target site of human |
|                 | D15         | AAVS1                    | atgctgtcctgagatgaggacata | GGGGCC                          | Endogenous target site of human |

|            |              |                                |                                |                                 |                                 |                                 |
|------------|--------------|--------------------------------|--------------------------------|---------------------------------|---------------------------------|---------------------------------|
|            | D16          | VEGFA                          | ccgggacccctcca ctctcctg        | GGCCCC                          | Endogenous target site of human |                                 |
|            | D17          | VEGFA                          | aggggggtgccga gga ccga a g     | GGCACC                          | Endogenous target site of human |                                 |
|            | D18          | VEGFA                          | tctcga ggta gcccc gcccgg       | GGATCC                          | Endogenous target site of human |                                 |
|            | D19          | VEGFA                          | agga a a cga cctggga cca cct   | GTTCCT                          | Endogenous target site of human |                                 |
|            | D20          | VEGFA                          | ctgtccctcctga gccca tgg        | GCAACC                          | Endogenous target site of human |                                 |
|            | D21          | AAVS1                          | gtcca ggcca a gta ggtgacct     | GGGGCC                          | Endogenous target site of human |                                 |
|            | D22          | VEGFA                          | aagggtgagtctcag gccaca g       | GGACCC                          | Endogenous target site of human |                                 |
|            | D23          | EMX1                           | a atgtgtgcttga gaa gtgga       | TGGCCC                          | Endogenous target site of human |                                 |
|            | D24          | GRIN2B                         | cccatca a gctgggctcca a gg     | AGGGCC                          | Endogenous target site of human |                                 |
|            | D25          | AAVS1                          | tgggtttga ga ga gga ggggct     | GGGGCC                          | Endogenous target site of human |                                 |
|            | D26          | GRIN2B                         | tta ca a tga ga ga ca a ta ctg | GCATCC                          | Endogenous target site of human |                                 |
| Figure4E   | E1           | AAVS1                          | gccctctctcctga gtcctgg         | ACCACT                          | Endogenous target site of human |                                 |
|            | E2           | AAVS1                          | cccctgga a gatgccatga ca g     | GGGGCT                          | Endogenous target site of human |                                 |
|            | E3           | AAVS1                          | gtggcta a a gcca gggga ga cgg  | GGTACT                          | Endogenous target site of human |                                 |
|            | E4           | AAVS1                          | aga a ga cta gctga gctctcgg    | ACCCCT                          | Endogenous target site of human |                                 |
|            | E5           | AAVS1                          | gtgga cccctga a ccca cgcgg     | AATCCT                          | Endogenous target site of human |                                 |
|            | E6           | AAVS1                          | tatca gga ga cta gga a gga gg  | AGGCCT                          | Endogenous target site of human |                                 |
|            | E7           | AAVS1                          | ctgggga a a ccta gtga ga a ccc | ATCTCT                          | Endogenous target site of human |                                 |
|            | E8           | VEGFA                          | tctcca ga cccta cctctgcc       | AGTGCT                          | Endogenous target site of human |                                 |
|            | E9           | EMX1                           | tgcggtga ca ga gca a gtgctg    | GGGGCT                          | Endogenous target site of human |                                 |
|            | E10          | VEGFA                          | aa a gcga ca ggggca a a gtga g | TGACCT                          | Endogenous target site of human |                                 |
|            | E11          | EMX1                           | gca gggca gtgcgggga ca ccg     | GGGGCT                          | Endogenous target site of human |                                 |
|            | E12          | VEGFA                          | ga gctctca cga a a ctga ggggt  | GAACCT                          | Endogenous target site of human |                                 |
|            | E13          | GRIN2B                         | gtga a gggta gta a ga ta t atg | AGACCT                          | Endogenous target site of human |                                 |
|            | E14          | GRIN2B                         | a a ca ga gta gctga ca tcca g  | TGGTCT                          | Endogenous target site of human |                                 |
| E15        | VEGFA        | gctga ca tga ca a a ta cca ggg | TGAGCT                         | Endogenous target site of human |                                 |                                 |
| Figure6B   | E16          | EMX1                           | ctga ga ca a gca gga gccca g   | CAAGCT                          | Endogenous target site of human |                                 |
|            | sg1          | B4GALNT2                       | tgtga cgcctcgggca tca gg       | AAAGCT                          | Target site of BeGALNT2 exon3   |                                 |
|            | sg2          | B4GALNT2                       | a gcta ta a cttgga gga tgcct   | ACGACC                          | Target site of BeGALNT2 exon3   |                                 |
|            | sg3          | B4GALNT2                       | gga tgccta cga cccgcgtga c     | CTCCCC                          | Target site of BeGALNT2 exon3   |                                 |
| Figure6D   | sg4          | B4GALNT2                       | a cccgcgtga cctcccgcga gt      | GAACCT                          | Target site of BeGALNT2 exon3   |                                 |
|            | sg1          | CMAH                           | aa gaa a a tga gttttgctct      | AGAACT                          | Target site of CMAH exon3       |                                 |
|            | sg2          | CMAH                           | tgtctta ga a cta a a tctctc    | TAACCC                          | Target site of CMAH exon3       |                                 |
|            | sg3          | CMAH                           | ta a cccgtggga tta ca ga a ccc | AGATCT                          | Target site of CMAH exon3       |                                 |
|            | sg4          | CMAH                           | aga a ccca gatctcctga a gat    | TTGGCT                          | Target site of CMAH exon3       |                                 |
|            | H1           | EMX1                           | gta gctggga cta ca ggcata gc   | ACCACC                          | Endogenous target site of human |                                 |
|            | H2           | EMX1                           | agtgtcta gggggcctgta gga       | ACCCTT                          | Endogenous target site of human |                                 |
|            | H3           | EMX1                           | ggga cta ca ggcata cca cc      | ACACCT                          | Endogenous target site of human |                                 |
|            | H4           | EMX1                           | tgtcta gggggcctgta gga a c     | CCCTCC                          | Endogenous target site of human |                                 |
|            | H5           | EMX1                           | a gcca ttttcta a ta tga tgg    | GCATCC                          | Endogenous target site of human |                                 |
| Figure S8C | H6           | EMX1                           | ca a a a ta a ttggcca gggctc   | ACCACT                          | Endogenous target site of human |                                 |
|            | H7           | EMX1                           | toga cctcctgggctoga ga ga      | TCTTCC                          | Endogenous target site of human |                                 |
|            | H8           | EMX1                           | tgtcta gcctca tgtgtctgc        | TCACCT                          | Endogenous target site of human |                                 |
|            | H9           | EMX1                           | tggcctggggcgta gga ggc         | CAAACC                          | Endogenous target site of human |                                 |
|            | H10          | EMX1                           | ga a ca ca tga ggcata ca ggt   | ACAACCT                         | Endogenous target site of human |                                 |
|            | H11          | AAVS1                          | cccctcttga ggcctgca tc         | ATCACC                          | Endogenous target site of human |                                 |
|            | H12          | AAVS1                          | cca ctga gca cta a a ggcctgg   | CCGGCC                          | Endogenous target site of human |                                 |
|            | H13          | EMX1                           | tca gtgtcca a ta a a gttca a   | ACTCCT                          | Endogenous target site of human |                                 |
|            | H14          | EMX1                           | ata a ga tctctgtttcccttc       | ACTCCC                          | Endogenous target site of human |                                 |
|            | Figure S9A-C | F1                             | EMX1                           | ga a ca ca tga ggcata ca ggt    | ACAACCT                         | Endogenous target site of human |
|            |              | F2                             | EMX1                           | agtgtcta gggggcctgta gga        | ACCCTT                          | Endogenous target site of human |
|            |              | F3                             | EMX1                           | tgtcta gggggcctgta gga a c      | CCCTCC                          | Endogenous target site of human |
|            |              | F4                             | EMX1                           | ata a ga tctctgtttcccttc        | ACTCCC                          | Endogenous target site of human |
|            |              | F5                             | EMX1                           | a gcca ttttcta a ta tga tgg     | GCATCC                          | Endogenous target site of human |
| F6         |              | EMX1                           | ca cca ca ta tta tca a a a g   | ACTCCT                          | Endogenous target site of human |                                 |
| F7         |              | EMX1                           | a gca gta a ta tta tca a a a g | CCTACT                          | Endogenous target site of human |                                 |
| F8         |              | EMX1                           | ca a a a ta a ttggcca gggctc   | ACCACT                          | Endogenous target site of human |                                 |
| F9         |              | EMX1                           | toga cctcctgggctoga ga ga      | TCTTCC                          | Endogenous target site of human |                                 |
| F10        |              | EMX1                           | tggcctggggcgta gga ggc         | CAAACC                          | Endogenous target site of human |                                 |
| Figure S9D | J1           | AAVS1                          | gtgaa ctgga gttgta ca gacct    | GGGGCC                          | Endogenous target site of human |                                 |
|            | J2           | AAVS1                          | cttcctcca cctgca ta gcc        | TGGGCC                          | Endogenous target site of human |                                 |
|            | J3           | AAVS1                          | ata tgcga ggtga gga a ggg      | AGGGCC                          | Endogenous target site of human |                                 |
|            | J4           | AAVS1                          | tga ga a tgggtgctccta ggtg     | TTCACC                          | Endogenous target site of human |                                 |
|            | J5           | AAVS1                          | a a gctcga gccctctcctggg       | CTTGCC                          | Endogenous target site of human |                                 |
|            | J6           | VEGFA                          | ccgggacccctcca ctctcctg        | GGCCCC                          | Endogenous target site of human |                                 |
|            | J7           | VEGFA                          | aggggggtgccga gga ccga a g     | GGCACC                          | Endogenous target site of human |                                 |
|            | J8           | VEGFA                          | tctcga ggta gcccc gcccgg       | GGATCCA                         | Endogenous target site of human |                                 |
|            | J9           | VEGFA                          | ctgtccctcctga gccca tgg        | GCAACC                          | Endogenous target site of human |                                 |
|            | K1           | mEMX1                          | gggtgggaa ggtga gcta a gca g   | AGGGCC                          | Endogenous target site of Mouse |                                 |
| Figure S9D | K2           | mEMX1                          | ta gga tggttctgcccgggga        | TGTGCC                          | Endogenous target site of Mouse |                                 |
|            | K3           | mEMX1                          | ccggctctga cgggtga cccgg       | CACACC                          | Endogenous target site of Mouse |                                 |
|            | K4           | mTh                            | gtgtcttggga ga ga gcccca       | TGATCC                          | Endogenous target site of Mouse |                                 |
|            | K5           | mTh                            | ga gtagga cttga gga a gccaca   | GGGACC                          | Endogenous target site of Mouse |                                 |
|            | K6           | mTh                            | a ctagga cgttcta ga a ccca     | GGACCC                          | Endogenous target site of Mouse |                                 |
|            | K7           | mRNF2                          | aggcca gcttga a cta cata g     | AGACCC                          | Endogenous target site of Mouse |                                 |
|            | K8           | mRNF2                          | aa gaa gccca a gga tga a gctg  | TTTGCC                          | Endogenous target site of Mouse |                                 |
|            | K9           | mEMX1                          | gatccggga ccttga a ga ca g     | GGTGCT                          | Endogenous target site of Mouse |                                 |
|            | K10          | mTh                            | atgca gcta a ga a gta tga a gg | GGCACT                          | Endogenous target site of Mouse |                                 |
|            | Figure S9D   | G1                             | AAVS1                          | cca cca a cggcca cggta tca g    | CGCCCT                          | Endogenous target site of human |
| G2         |              | AAVS1                          | cccctcttga ggcctgca tc         | ATCACC                          | Endogenous target site of human |                                 |
| G3         |              | AAVS1                          | cca ctga gca cta a a ggcctgg   | CCGGCC                          | Endogenous target site of human |                                 |
